# Supplementary material for: Bioinspired osteoblast-imprinted piezoelectric PDMS/BaTiO3 nanocomposites accelerate the osteogenic differentiation of adipose-derived stem cells under mechanical stimulation
Source: Royal Society of Chemistry journal article supplement (doi:10.1039/d5tb00736d), 2025-01-01
Supplement: d5tb00736d1.pdf [file d5tb00736d1.pdf]

## Bioinspired Osteoblast-imprinted Piezoelectric PDMS/BaTiO<sub>3</sub> Nanocomposites Accelerate the Osteogenic Differentiation of Adipose-derived Stem Cells under Mechanical Stimulation

F. Pouladzadeh <sup>a</sup>, Sh. Bonakdar <sup>b\*</sup>, N. Haghighipour <sup>b</sup>, A.A. Katbab <sup>a†</sup>, S. Bagheri-Khoulenjani <sup>a\*</sup>

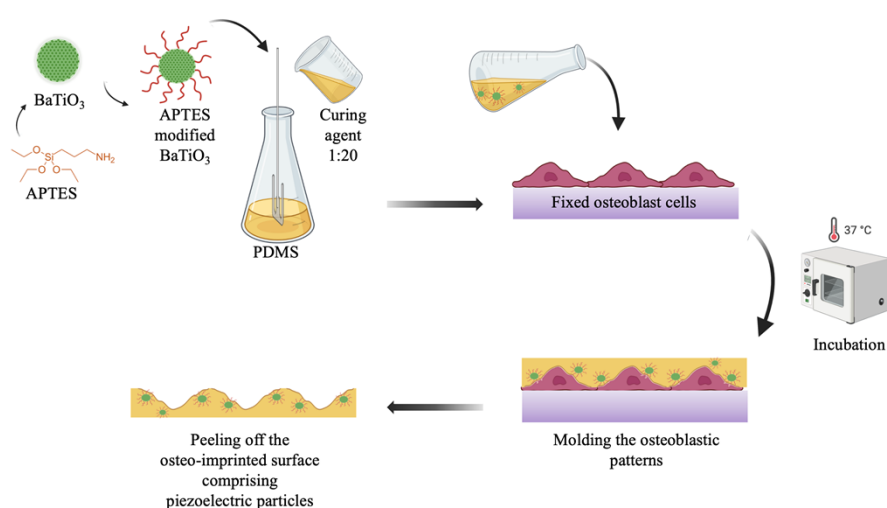

**Figure S1** Schematic of the osteoblast-imprinted PDMS/20BaTiO<sub>3</sub> substrate fabrication process.

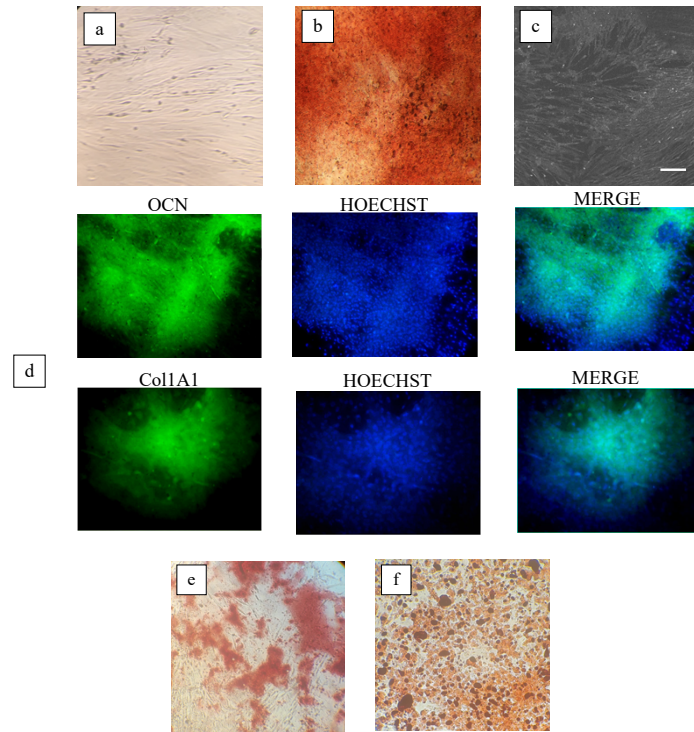

**Figure S2** Characterization of isolated human osteoblasts used for the preparation of templates for cellular imprinting. The osteoblastic nature of the cells is confirmed by the results of optical microscopy (a), alizarin red staining (b), SEM (c), and immunostaining (d). The scale bar represents 200  $\mu$ m. Alizarin red (e) and Oil red (f) staining results confirmed the differentiation potential of ADSCs towards osteogenic and adipogenic lineages.

**Table S1** Sequences of primers used in Real-Time PCR

| primer | sequence                       |                                 |
|--------|--------------------------------|---------------------------------|
| RUNX2  | Forward TCCAGACCAGCAGCACTCC    | Reverse CCATCAGCGTCAACACCATC    |
| ALP    | Forward GCCTTGCTCACTCACTCACT   | Reverse ACAGGAGAGTCGCTTCAGAGA   |
| Col-I  | Forward CGATGGCTGCACGAGTCA     | Reverse GGTTCAAGTTGGGTTGCTTGTC  |
| OCN    | Forward CAGGAGGGCAGCGAGGTAG    | Reverse CCGATGTGGTCAGCCAAC      |
| ON     | Forward TGGCAGAGGTGACTGAGGTATC | Reverse GTCCTGGCACACGCACAT      |
| GAPDH  | Forward GAGTCCACTGGCGTCTTCA    | Reverse TCTTGAGGCTGTTGTCATACTTC |

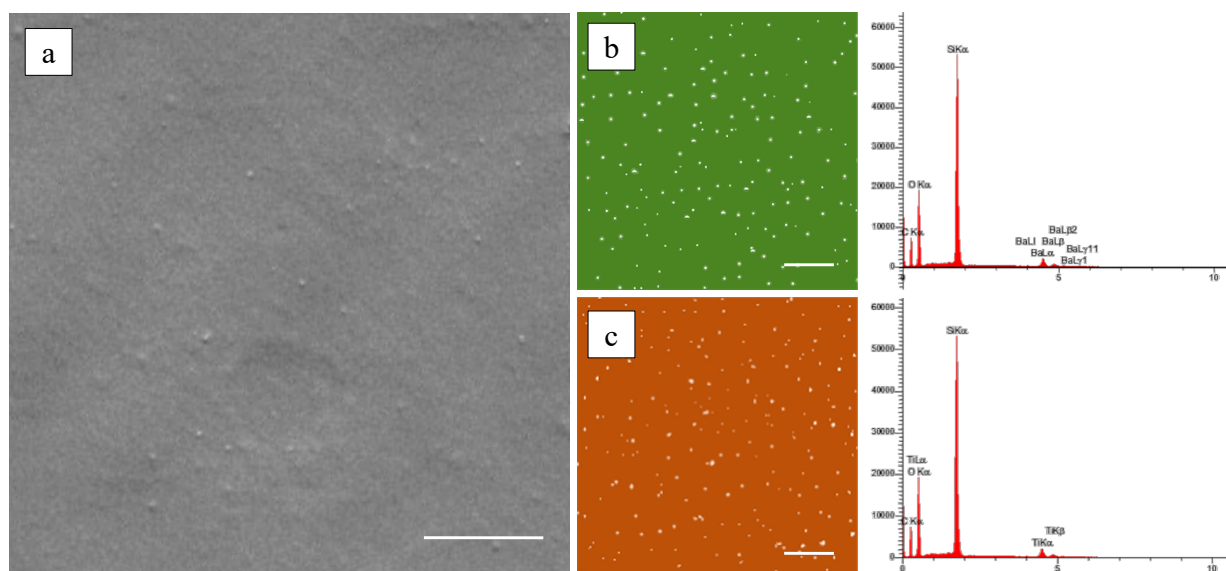

**Figure S3** SEM micrograph of PDMS filled with 20 wt% APTES modified BaTiO<sub>3</sub> (a). Results of surface mapping and elemental analysis by EDS technic for Titanium (b) and Barium (c). The micrographs are acquired at the magnification of 1000x; The scale bar represents 20  $\mu$ m.

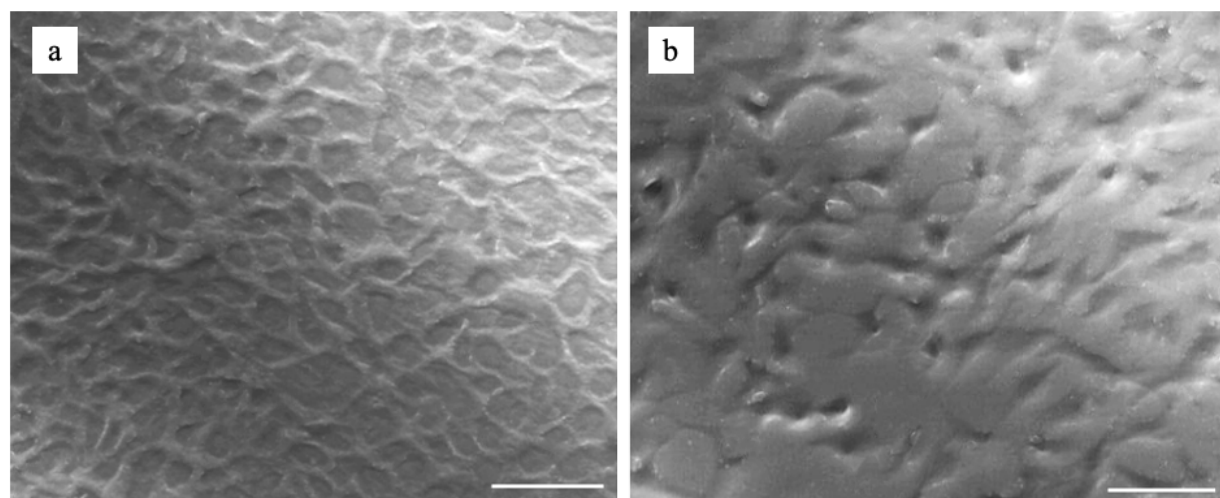

**Figure S4** SEM micrographs of PDMS/20BaTiO<sub>3</sub> imprinted substrates comprising patterns of MG-63 (a) and HeLa (b) cell footprints. The micrographs are acquired at the magnification of 250x; The scale bar represents 50  $\mu$ m.
